# Template-based design of peptides to inhibit SARS-CoV-2 RNA-dependent RNA polymerase complexation

Akshay Chenna<sup>1</sup>, Wajihul H Khan<sup>1</sup>, Rozaleen Dash<sup>1</sup>, Anurag S Rathore<sup>1,2</sup>, and Gaurav Goel<sup>1,2</sup>

<sup>1</sup>Chemical Engineering Department, Indian Institute of Technology Delhi

This manuscript was compiled on January 24, 2022

**The RNA-dependent RNA polymerase (RdRp) complex of SARS-CoV-2 lies at the core of its replication and transcription processes. The interfaces between the subunits of the RdRp complex are highly conserved, facilitating the design of inhibitors with high affinity for the interaction hotspots of the complex. Here, we report development and application of a structural bioinformatics protocol to design peptides that can inhibit RdRp complex formation by targeting the interface of its core subunit nonstructural protein (nsp) 12 with accessory factor nsp7. We adopt a top-down approach for protein design by using interaction hotspots of the nsp7-nsp12 complex obtained from a long molecular dynamics trajectory as template. A large library of peptide sequences constructed from multiple hotspot motifs of nsp12 is screened *in silico* to determine peptide sequences with highest shape and interaction complementarity for the nsp7-nsp12 interface. Two lead designed peptide are extensively characterized using orthogonal bioanalytical methods to determine their suitability for inhibition of RdRp complexation and anti-viral activity. Their binding affinity to nsp7 (target), as determined from surface plasmon resonance (SPR) assay, is found to be comparable to that of the nsp7-nsp12 complex. Further, one of the designed peptides gives 46 % inhibition of nsp7-nsp12 complex at 10:1 peptide:nsp7 molar concentration (from ELISA assay). Further optimization of cell penetrability and target affinity of these designed peptides is expected to provide lead candidates with high anti-viral activity against SARS-CoV-2.**

Protein-protein interactions | Template design | Therapeutics

## Introduction

The Coronavirus disease 2019 (COVID-19) is caused by a new strain of  $\beta$ -coronaviruses termed Severe Acute Respiratory Syndrome Coronavirus 2 (SARS-CoV-2).<sup>(1, 2)</sup> At the heart of the transcription machinery of SARS-CoV-2 virus is the RNA-dependent RNA polymerase (RdRp) which controls the genomic replication processes of single stranded RNA viruses. The genome is used as a template by hijacking the machinery of the host cells to translate RdRp which in turn is used to complete the transcriptional synthesis of different protein structures and RNAs in SARS CoV2.<sup>(3, 4)</sup> RdRp is a trimeric complex of three different proteins non structural proteins viz NSP7, NSP8 and NSP12 of which NSP12 is the core catalytic unit and a target of several drug discovery programs.<sup>(5, 6)</sup> Recent studies revealed highly conserved structural and functional features of RdRp in coronaviruses and an amino acid sequence identity of 96% with the RdRp of SARS-CoV.<sup>(7, 8)</sup> It is understood that the interaction of NSP7 and NSP8 with NSP12 significantly enhances the polymerase activity of the otherwise minimal activity of innate NSP12. <sup>(9–11)</sup> Therefore targeting the integrity of the RdRp complex by exploring the hotspots to disrupt the protein-

protein interactions in the subunit has been suggested as an effective drug discovery strategy.<sup>(12, 13)</sup> The crystal resolved structure and long trajectory from Molecular Dynamics (MD) simulations of RdRp reveal major contributions to NSP12 binding by NSP7 as opposed to NSP8 which forms much fewer contacts.<sup>(6, 14)</sup> Cryo-EM maps revealed that the N-terminal region of NSP8 adopts an extended, disordered conformation making it a challenging target for disrupting protein-protein interactions (PPIs). Moreover the binding site on NSP12 made by NSP7 is well conserved in contrast to the binding site by the NSP8 subunit.<sup>(7)</sup> NSP7 in SARS-CoV-2 shares 100% sequence similarity with SARS-CoV in stark contrast to the envelope proteins of coronaviruses. Additionally, NSP7 is found to make several protein-protein interactions in the cellular viral proteome making it a prime pharmacological target.<sup>(15)</sup> Three FDA approved small molecules drugs viz. Metformin, Entacapone and Indomethacin were identified with the potential role of disrupting the network of protein interactions made by NSP7. <sup>(13)</sup> However, none of these drugs target the interface made with NSP12 protein. Therefore we have chosen the protein-protein interface of NSP12-NSP7 complex as a target for development of orthosteric inhibitory drugs.

Peptide sequences can be computationally tailored to mimic the hotspot interactions of one of the binding partners and are thus considered as natural inhibitors of PPIs.<sup>(16, 17)</sup> Several peptides have been reported as potent against microbial pathogens including the recent approval of anti-HIV peptides.<sup>(18–20)</sup> With a steady development and approval of peptide based drugs in the recent past, they are seen as promising alternatives to small molecule drugs due to high selectivity and easy of manufacturing.<sup>(21)</sup> Short peptides possess low immunogenicity profiles, minimal off-target interactions and cheaper production costs. Despite their effectiveness in disrupting PPIs, peptides have a notably short duration of action due to proteolysis and rapid renal clearance.<sup>(22)</sup> Protein based drugs such as peptides, miniproteins, nanobodies and antibodies have also been identified to target PPIs of structural proteins on SARS-CoV2.<sup>(21, 23–29)</sup> There are over 60 small molecules targeting the enzymatic activity of RdRp and over 30 small molecules targeting intracellular PPIs are in active clinical trials <sup>(30)</sup> yet fewer peptide based drugs have been developed for intracellular targets.<sup>(6, 31)</sup> In this work, we report short peptide sequences that bind with nanomolar

AC handled computational aspects under the supervision of GG, WHK and RD handled experiments under the supervision of ASR. All authors contributed in writing the manuscript.

No competing interests declared.

<sup>2</sup>To whom correspondence should be addressed. E-mail: goelg@iitd.ac.in, asrathore@biotechmz.com

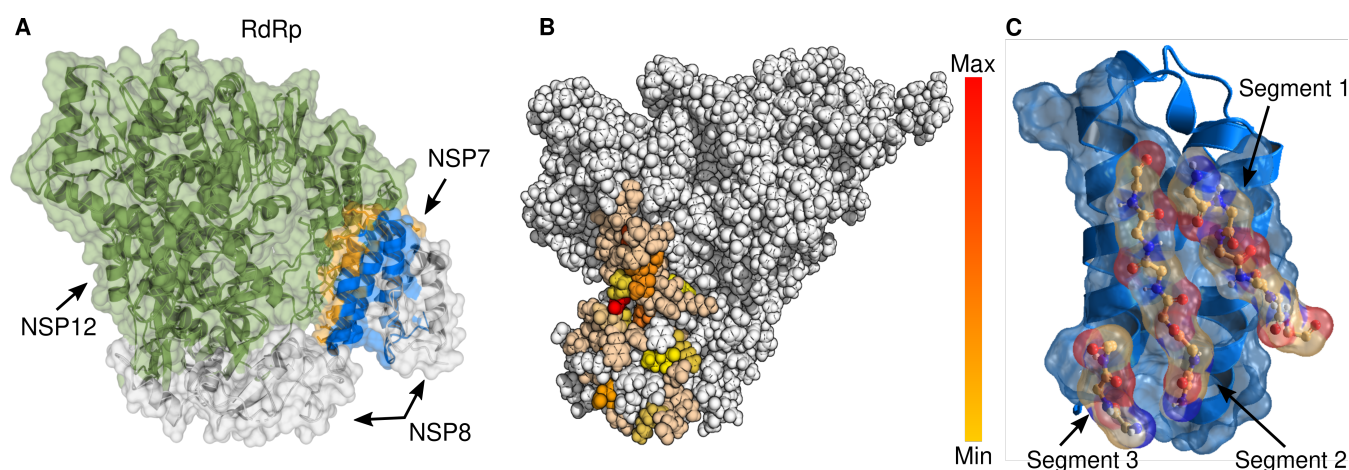

**Fig. 1. NSP12-NSP7 subunit interactions of RNA dependent RNA polymerase (RdRp).** **A** Interactions between the proteins involved in RdRp complex are depicted. NSP7 is known to contribute the maximum to the binding affinity with NSP12. **B** Key hotspot interactions made by NSP12 as an ensemble average over a MD trajectory are highlighted with a color gradient. **C** Three sequentially contiguous hot-segments identified from the hotspots are shown. These segments are spatially connected by linkers to generate *in-silico* peptide libraries.

66 affinity ( $\sim 100$  nM) to the NSP7 protein monomer of RdRp  
67 to inhibit the polymerase activity of NSP12. Protein-protein  
68 interaction hotspots identified from a long molecular dynamics  
69 (MD) trajectory were used as a template for creating an  
70 *in-silico* library of peptide sequences. Our in-house structural  
71 bioinformatics based protocols mined and iteratively screened  
72 peptide sequences to generate valid decoys that bind with  
73 similar or slightly higher affinity than the original protein  
74 receptor.

## 75 Results and discussion

76 **Determination of hotspot residues on NSP12 interface.** Heteromeric  
77 protein-protein interactions bury on an average  $1900 \text{ \AA}^2$   
78 of surface area upon binding, translating to 57 amino acids per  
79 interface.(32) However only a small fraction of these residues  
80 at the protein interface contribute the largest to binding  
81 energy. These residues are termed as hotspots of binding  
82 interactions.(33) In our work we demonstrate a structural  
83 bioinformatics pipeline for designing peptides by identifying  
84 hotspots from a long molecular dynamics (MD) trajectory.  
85 Our design strategy begins with using the information from  
86 identified hotspots from one of the protein binding partners  
87 as templates for generation of a library of peptide sequences  
88 with a goal of antagonistically inhibit a protein-protein inter-  
89 action. Similar template based strategies involve using the  
90 hotspot residues from the crystal complex of the heterodimer  
91 to construct a optimised protein,(16) or from the topological  
92 information of the binding partner without using the  
93 sequence.(24, 27) By aiming to mimick the binding inter-  
94 actions of NSP12 we seek to achieve equal or improved binding  
95 affinity to the target protein (NSP7) at optimal concentrations  
96 to inhibit *in-vivo* viral interactions.(34) Peptide mimetics of  
97 protein protein interactions present several advantages. Firstly,  
98 it understood that peptides derived from the binding interface  
99 can mimic the entire partner protein and bind more tightly  
100 to the target protein.(35) An exhaustive study carried out  
101 using X ray crystallography and rigid-body ligand docking  
102 found out that the interface of the holo protein in the ligand  
103 bound state shows a high match with the interface in a protein-  
104 protein complex.(36) This study corroborates the motive for

conformational change induced upon ligand binding to mimic  
that of the partner protein. The results from their work thus  
suggest that the protein-bound conformation of the receptor  
is a significantly better starting point for drug design than the  
*apo* structure. London et al. have demonstrated on a large  
scale that self-inhibitory peptides can be derived from the  
interfaces of protein-protein interactions.(37) These peptides  
have been shown to be effectively mimic the binding modes  
of the origin domain of the peptide and bind with similar or  
better binding affinities owing their origin to *hot segments*  
on the protein-protein interface.(38) Secondly, it has been shown  
that the conformational change upon binding to helical pro-  
teins results on an average of 0.11 nm change in the RMSD of  
the  $C\alpha$  atoms compared to the free state, resembling the *apo*  
conformation in the *holo* state.(39) Since NSP7 is an helical  
bundle of three helices, we believe that peptides derived from  
the bound interface of NSP12 will effectively bind to the *apo*  
state of NSP7. Additionally, computational solvent mapping  
studies which estimate the ligand druggability demonstrate  
that the interactions between globular proteins results in con-  
formational changes largely restricted to 0.6 nm of the binding  
hotspot representing a high degree of structural conversation  
of the binding hotspot in the *apo* and *holo* states.(40) Another  
study demonstrates that surfaces with binding sites are predis-  
posed in the *apo* structure of globular proteins making them a  
feature of druggable sites as found from computational fluctua-  
tional simulations.(41) Thirdly, from a more realistic statistical  
ensemble picture it can be argued that the fit induced in NSP7  
upon binding to NSP12 results in a conformation that is al-  
ready present in the *apo* state of NSP7 since binding only  
induces a shift in the relative population of the conformations  
that favour binding.(42) This justifies our use of the *holo* state  
for designing effective inhibitors of PPIs. We determined the  
hotspot residues on NSP12 in the NSP12-NSP7 dimer subunit  
complex from a MD trajectory of RNA-dependent RNA poly-  
merase (RdRp) of SARS-CoV2 by calculating the difference in  
the residue-wise area buried (eq 1). The trajectory was  
clustered using a cutoff of  $2.5 \text{ \AA}$  on the backbone atoms of  
RdRp. The residue-wise hotspot areas were weighted ( $\Delta A_i$ )  
by the population fraction of the cluster.

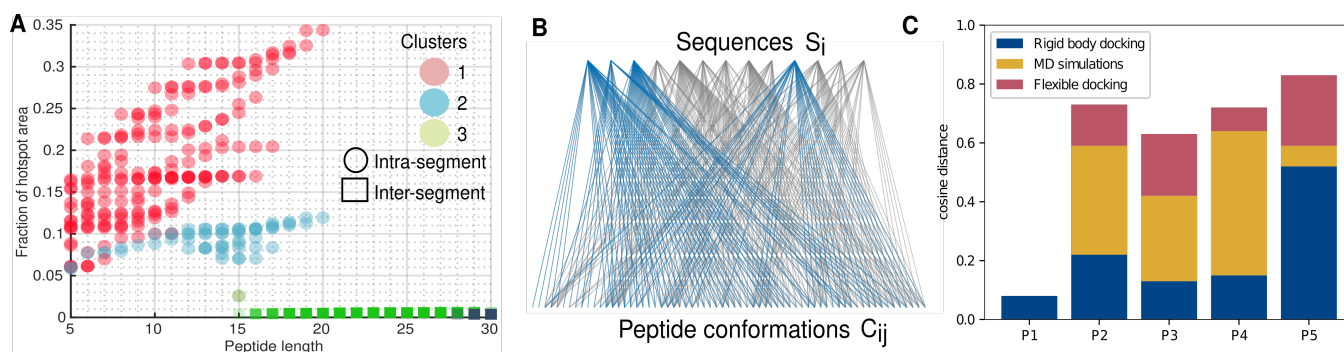

**Fig. 2. Bioinformatics and simulation strategies for screening peptides.** **A** The library of peptide sequences constructed are scored with the hotspot areas of NSP12 segments identified from simulations. The plot compares the cumulative hotspot area of the peptide as a function of peptide lengths. Peptides derived from the same segment are shaped in  $\circ$  and inter-segment peptides are depicted in  $\square$ . The sequences are colored with respect to the NSP12-NSP7 cluster from which the sequences were constructed. **B** TM-scores are cross computed for 65 peptide conformations generated from 13 peptide sequences are shown in the bottom and top layers respectively. An edge represents the ability of the peptides to adopt a conformation. Unique peptide sequences and folds identified from integer linear programming on a binary matrix of TM-scores are shown in blue. **C** Binding interface similarity measured by the cosine distance of the docked peptides in comparison to the interface of cluster center of the most populated cluster of NSP12-NSP7 is plotted for peptides (P1 to P5). Higher dot products indicate better ability of the peptides to replicate the binding modes of NSP12.

145 As a result, the interface residues on NSP12 contribute  
 146 differently to binding with NSP7 indicating a complex, discontinuous  
 147 binding epitope (Figure 1). The interface was split  
 148 into contiguous stretches of amino acid sequences by allowing  
 149 upto three intervening non-interface residues (i.e.  $\Delta A_i = 0$ ).  
 150 A similar approach was followed by Jones and Thornton (43)  
 151 allowing a break of five residues. Pal et al. (44) analyzed  
 152 interfaces of heterodimeric complexes and found that a typical  
 153 surface contains an average of 5.6 segments in agreement with  
 154 our observation of five segments on the interface of NSP12  
 155 of which the prominent three are highlighted in Figure 1.  
 156 However allowing a shorter stretch of non-interface residues  
 157 resulted in large segments consisting upto 20 amino acids.(SI)

158 **Peptide design.** Most studies have focused on design from a  
 159 linear template of binding motifs from one segment. The  
 160 disembodied segments identified from the hotspot region of  
 161 NSP12's interface originating from the dynamic binding interface  
 162 were connected by linkers to create a composite peptide  
 163 topology (Figure 1. Amino acid fragments within a segment  
 164 were assembled by varying the sequence lengths leads to multiple  
 165 sequences. Glycine and alanine linkers combinatorially  
 166 connect every possible spatially close residues from two different  
 167 segments based on the  $C_\alpha$  distances of the joining residues  
 168 (Table 1). We also generated sequences from the same segment  
 169 that resulted in a library of over 93,000 sequences ranging  
 170 from three to 37 amino acids. Sequences originating from  
 171 the parent segments contain rim residues or show little  
 172 contribution to the binding hotspots were removed by scoring  
 173 the library peptides. As shown in Figure 2 the constructed  
 174 sequences are scored by the sum of the hotspot areas of the  
 175 residues as found in the origin domain and weighted by the  
 176 cluster population from which the interface was analysed ( $\sum_i A_i P^c$ ,  
 177 Section ). We found that 21 of the highest scored 50  
 178 sequences have a length of 8-12 amino acids, an ideal size for  
 179 therapeutic peptides. Design of longer peptides is an added  
 180 challenge as the folded states must be made stable enough  
 181 to minimize conformational entropic cost upon binding to  
 182 the target protein while very short peptides may not capture  
 183 the native hotspot interactions made by NSP12.(39) The  
 184 sequences derived are from the most populated cluster of the  
 185 MD trajectory and contain no sequences from two segments.

186 We therefore added two inter-segment sequences with the highest  
 187 hotspot scores to the existing set of 21 for further design  
 188 evaluations. Five low energy conformations for each of the  
 189 23 peptides were generated using a de-novo coarse grained  
 190 optimized potential for efficient structure prediction (OPEP)  
 191 forcefield at physiological pH.(45) The corresponding charge  
 192 on the peptide was found at physiological pH from residue  $pK_a$   
 193 values using the propka web-server.(46) The peptide conformations  
 194 were modelled by taking the structure of the receptor (NSP7)  
 195 into account, generating poses of peptide-protein at the given  
 196 binding patch. However we filtered 10 peptides due to their  
 197 inability to mimic the backbone topology of the functional motifs  
 198 from the origin domain (backbone RMSD > 0.35 nm). To achieve  
 199 high binding activity, the peptides must fold into states that  
 200 replicate the binding modes of the defined template(47). Additionally,  
 201 this ensures that our peptides have a high complementary shape  
 202 to the target as seen in the native hotspot interactions leading to  
 203 high functionally accurate mimetics. Finally, our combinatorial  
 204 approach of assembling amino acids might result in large number  
 205 of entries with high sequence identity that could lead to the same  
 206 therapeutic functionality. To remove redundant peptide sequences  
 207 (and consequently folds) in the remaining set of 13 peptides,  
 208 we used a TM-score (template modelling score) metric to classify  
 209 similarity.(48) The peptides were aligned prior to TM-score  
 210 evaluations by standard Needleman-Wunsch algorithm with a  
 211 custom identity mutation matrix (see SI table for matrix).  
 212 This method aligns the sequences based on their identities  
 213 instead of similarities. We applied weighted integer linear  
 214 programming (wILP) method on the  $65 \times 65$  binary TM-score  
 215 matrix of 13 peptides (each peptide has 5 conformations) to  
 216 select a minimal set of non-redundant peptides with the highest  
 217 hotspot fraction of the blueprint interface (Section ).  
 218 Optimisation of peptide similarity has resulted in five distinct  
 219 peptide sequences (Figure 2). The selected peptides possess  
 220 nearly 40% of the hotspot area as compared to the origin domain.  
 221

222 **Peptide binding.** To evaluate the quality of our designs we  
 223 adopted a multi-step docking process. We began with a global  
 224 blind docking of each of the five shortlisted peptides (P1-P5)  
 225 to allow for a complete 3 dimensional exploration of the target  
 226 surface. This exercise will narrow down on the binding

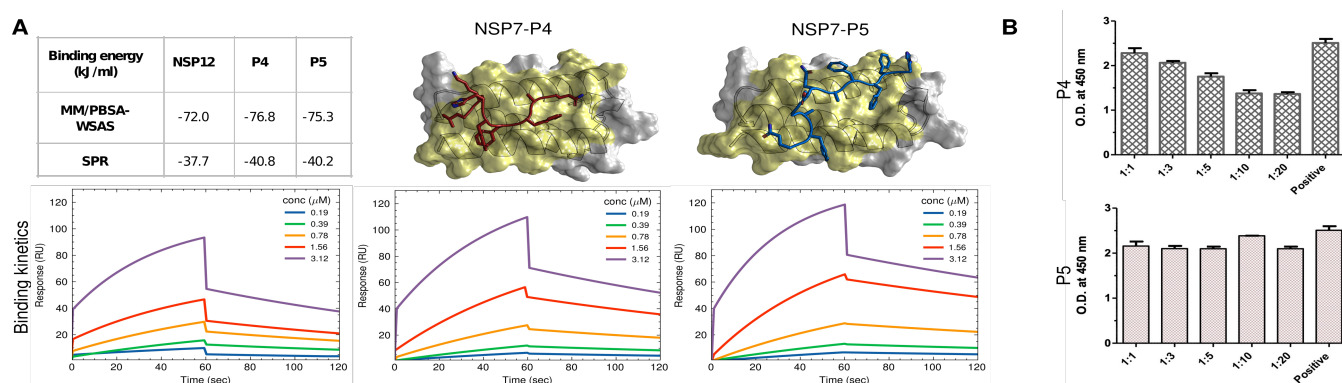

**Fig. 3. Peptide binding to NSP7.** **A** Table compares the binding affinity of proteins from MMPBSA-WSAS method on the docked complex to the affinity determined from SPR experiments. SPR curves for NSP12-NSP7 and peptides **P4** and **P5** to NSP7 respectively. The cartoons show the binding pose of peptides to NSP7 with the highest  $\cos \theta$ . Patch colored in yellow is the interface of NSP7 when bound to NSP12. **B** Competitive inhibition of NSP12-NSP7 complexation in the presence of peptides is measured by ELISA assays. The signal is a measure of the NSP7 that remains bound to NSP12. Inhibition is measured for peptide ratios upto 20 times the concentration of NSP7.

227 site locally favoured by the peptides providing information on  
 228 the binding specificity of the designed molecules. A robust  
 229 quantitative descriptor developed by Anivash et al. (17) to  
 230 evaluate the binding of quality given by the cosine distance  
 231 ( $\cos \theta$ , see methods for details on construction procedure) was  
 232 determined for the docked peptide-NSP7 complexes. Higher  
 233 values of  $\cos \theta$  indicate preference for the peptides to share  
 234 the same interface with NSP7 as shared by NSP12 in the RdRp  
 235 subunit. The binding energies of peptide-protein binding for  
 236 evaluating  $\cos \theta$  were calculated by MMPBSA-WSAS (Molec-  
 237 ular Mechanics/Poisson Boltzmann/ Surface Area-Weighted  
 238 solvent accessible surface area)(49, 50) method to compute the  
 239 enthalpy and vibrational entropy. We notice lower values of  
 240  $\cos \theta$  during the first step of as the peptides were rigidly  
 241 docked. However, peptides are very flexible and are known to adapt  
 242 to the unbound structure of the receptor protein. Therefore we  
 243 have allowed the peptides to undergo local perturbations to  
 244 allow the peptide to refold and optimise the binding. Initial  
 245 hits (docked poses with highest  $\cos \theta$  with the exception of P1,  
 246 rejected due to poor scores) were considered for this step of  
 247 flexible docking. Using FlexPepDock protocol implemented  
 248 in Rosetta we carried out small-scale rigid body motion of  
 249 the peptide coupled with backbone shear.(51) Alternate bind-  
 250 ing modes were explored by enumerating multiple side-chain  
 251 rotamer conformations of individual residues of the peptide  
 252 (Figure 2). By introducing flexibility we observe a significant  
 253 improvement in the re-computed  $\cos \theta$ . This conformational  
 254 sampling of the peptides is indicative of the ability of the  
 255 peptides to fold and adapt a complementary shape to the  
 256 backbone structure of the binding partner. As a final determi-  
 257 nant of our design success we performed short all-atomic MD  
 258 simulations of the peptide-protein complexes with the highest  
 259  $\cos \theta$  from the flexible docking stage in water buffer mimicking  
 260 physiological conditions. Although we notice a decrease in  
 261 the cosine similarity distance in the MD trajectories of the  
 262 peptide-NSP7 complexes, the dot products can be considered  
 263 to be high enough for the designed peptides to enable high  
 264 specificity binding to the protein. Overall, considering the  
 265 increasing intensity of validation with three docking steps  
 266 we selected two designs viz. **P4** and **P5** for experimental  
 267 validation as inhibitors of protein-protein association of the  
 268 NSP12-NSP7 subunit of the RdRp complex.

**Experimental testing.** RdRp functions as a polymerase in the  
 269 infected cell's cytoplasm. Thus drugs must penetrate the host  
 270 cell to disrupt the intracellular PPis of RdRp. Peptides **P2**  
 271 to **P5** were appended by a short string of poly arginines at  
 272 the N-terminal for evaluating cell-penetrability using sequence  
 273 based predictors.(52) Sequences **P4** and **P5** were classified as  
 274 probable cell-penetrable entities while sequences **P2** and **P3**  
 275 showed poor cell-penetration confidence and consequently were  
 276 not validated *in-vitro* for binding activity.(SI) We measured  
 277 the kinetics of **P4** and **P5** binding to NSP7 via Surface Plas-  
 278 mon Resonance experiments (SPR, Figure 3B). Both peptides  
 279 showed similar dissociation constants ( $K_D$ ) of 133 nM and 167  
 280 nM and similar binding kinetic profiles. The peptides possess  
 281 marginally improved binding affinity with NSP7 in comparison  
 282 to the NSP12-NSP7 complex (Table 3A). In contrast to the  
 283 experimentally predicted binding energies,  $\Delta G_{\text{MMPBSA-WSAS}}$   
 284 has over-estimated the binding energies by nearly two orders  
 285 of magnitude. Though it is noteworthy that the binding  
 286 free energies are predicted similar trends as measured by SPR.  
 287 Peptide-NSP7 docked poses with the highest dot products  
 288 ( $\cos \theta$ ) after flexible docking are depicted in figure 3A with  
 289 the interface patch of NSP7 with NSP12 is colored in yellow. Poses  
 290 with high dot products signifying better binding specificity  
 291 are a strong indicator of the peptides' ability to mimic the  
 292 binding modes of NSP12 and serve to validate our approach  
 293 of peptide design. Subsequently, the peptides were tested  
 294 for competitive binding with labelled NSP7 (his-taq) in the  
 295 presence of immobilised NSP12 using ELISA binding assays.  
 296 The signal in Figure 3B is a measure of the NSP7 bound to  
 297 the NSP12. **P4** shows 46% inhibition in the binding of NSP7  
 298 with NSP12 at ten times the molar concentration of NSP7  
 299 translating to an  $IC_{50}$  of about 50  $\mu\text{M}$  for **P4**. However, **P5**  
 300 did not show significant inhibition even at high concentrations  
 301 indicative of specificity at a non-neutralising site. ELISA based  
 302 competitive assays suggest that our peptide sequence needs  
 303 further optimisation for achieving higher affinities, highlight-  
 304 ing a fundamental shortcoming of our approach in restricting  
 305 the sequences of peptides from the template. Similar observa-  
 306 tions were made by Valiente et al (27), where the L-isoforms  
 307 showed a 43 times lower binding affinity to the spike protein  
 308 in comparison to the D-isoforms. Moreover, by constraining  
 309 the peptides to emulate the backbone fold of the template  
 310 we are intrinsically limiting the maximum possible binding  
 311

312 affinities of the peptides. (24, 34) *De-novo* design of stable  
 313 folds could potentially enable topologies that manifest higher  
 314 binding enthalpies and minimize entropic costs of folding to  
 315 the holo state.

## 316 Conclusion

317 We developed a structural bioinformatics pipeline demonstrat-  
 318 ing rational design of peptide inhibitors of protein-protein  
 319 interactions from a long MD trajectory. The protocols aim to  
 320 identify valid sequences from a virtual library of sequences con-  
 321 structed using information of the template hotspots such that  
 322 critical interactions made by the template are mimicked by  
 323 the peptide. This is ensured by screening sequences containing  
 324 a high fraction of the hotspot residues as identified in the tem-  
 325 plate followed by their ability to reproduce the backbone folds  
 326 from the structural repertoire of the interface of the template  
 327 protein. To check the translation of the topological features  
 328 of the peptides into binding affinity and specificity *in-silico*, the  
 329 filtered sequences were docked in two stages, viz. rigid body  
 330 global docking and flexible local docking. A final short MD  
 331 simulation confirmed the presence of metastable peptide bind-  
 332 ing poses to the interacting interface of NSP7 in RdRp. Two  
 333 sequences, **P4** and **P5** were shortlisted for experimental vali-  
 334 dation based on higher predicted cell-penetration confidence  
 335 than **P2** and **P3**. Similar profiles of binding kinetics of the  
 336 peptides and NSP12 to NSP7 from SPR measurements provide  
 337 proof of concept of our approach in the ability of the peptides  
 338 to replicate the origin domain interactions. Competitive as-  
 339 says based on ELISA substantiated the need for optimised  
 340 sequences and folds different from the template for enhancing  
 341 the binding affinity. Finally, we need to incorporate positive  
 342 strategies for design that allows peptides to penetrate the cell  
 343 membrane efficiently and target intracellular protein-protein  
 344 interactions with high *in-vivo* efficacy. Requiring minimal  
 345 computational efforts our template based design approach  
 346 demonstrates that self inhibitory peptides derived from the  
 347 interface of protein-protein interactions can serve as a good  
 348 starting point for further refinement and lead optimisation.

## 349 Methods and materials

### 350 Computational design.

351 **Determination of binding hotspots.** Key hotspot residue interac-  
 352 tions made by NSP12 with NSP7 were obtained from the  
 353 solvent accessible surface area analysis of its dimeric subunit  
 354 complex of RdRp from a 10  $\mu$ s molecular dynamics trajectory.  
 355 (14) Interface residues on NSP12 are found from Eq. 1

$$356 \quad \Delta A^{\text{NSP12hotspots}} = \frac{A^{\text{NSP12monomer}} - A^{\text{NSP12dimer}}}{A^{\text{NSP12dimer}}_{\text{total}}} \quad [1]$$

357 From a sufficiently long MD trajectory, a residue's contribution  
 358 to the binding hotspot is found by weighing its  $\Delta A$  with a  
 359 factor  $P_c$  that captures the probability of a residue to lie at the  
 360 interface with NSP7. The MD trajectory was clustered using a  
 361 0.25 RMSD cutoff on the backbone atoms of the NSP12-NSP7  
 362 dimeric subunit.  $P_c$  for a given cluster  $c$  is the population  
 363 fraction of the cluster ( $P_c = \frac{N_c}{\sum_c N_c}$ ) as observed in a MD  
 364 trajectory obeying the ergodic principle.

**Table 1. Residues from different segments were connected based on the C $\alpha$ -C $\alpha$  distances by a Glycine/Alanine bridge**

| Distance (nm) | Bridge  |
|---------------|---------|
| <0.7          | -G-     |
| 0.7-1.0       | -G-A-   |
| 1.0-1.3       | -G-A-A- |

**Design strategy.** Following the work of Mishra et al., (17) 365  
 366 sequences of peptides were built by sewing a chain of spatially  
 367 close hotspot residues from two different binding segments of  
 368 the hotspot as given in Table 1. A segment is defined as a  
 369 continuous sequence of residues on the NSP12 binding inter-  
 370 face. The segment terminates if three or more consecutive  
 371 residues are not part of the binding hotspot (i.e.  $P_i \Delta A = 0$ ).  
 372 A combinatorial library of such inter-segment connections  
 373 was made and appended by intra-segment derived sequences.  
 374 Peptides in the generated library were scored by the hotspot  
 375 areas as evaluated from their parent NSP12 conformation.  
 376 Peptide sequences with length less than 12 amino acids were  
 377 selected from the top scoring sequences. Five conformations  
 378 with the lowest energy were selected using the OPEP forcefield  
 379 implemented in PEPFOLD. (53)

**Assessment of peptide fold and elimination of redundancy.** 380  
 381 Peptides are rejected if the backbone of the lowest energy conforma-  
 382 tions do not adopt to their origin motif's (NSP12) structure  
 383 using a criteria of  $< 3.5 \text{ \AA}$  backbone RMSD. A structural  
 384 template modelling score (TM-Score) was applied for evaluat-  
 385 ing conformational and sequence similarity in the shortlisted  
 386 peptides.(54) The sequences of the selected set of peptides were  
 387 aligned using the Needleman–Wunsch algorithm implemented  
 388 in MATLAB's Bioinformatics Toolbox. (55) To determine  
 389 the sequence identity, alignment was performed using an iden-  
 390 tity mutation matrix, created using the `eye(20)` command.  
 391 This amino acid mutation matrix used for global sequence  
 392 alignment on the fasta sequences of peptides prior to TM-  
 393 Score calculations. TM-Score matrix was computed for all the  
 394 conformations (each peptide has five conformations). Confor-  
 395 mations with structures greater than 0.5 are said to be within  
 396 the same fold and thus similar. To select a non-redundant set  
 397 of peptide sequences and folds we employed linear integer pro-  
 398 gramming (ILP) based optimisation on a binary TM-score ma-  
 399 trix weighted by the hotspot areas of all residues derived from  
 400 their respective parent template ( $\sum_r P_r \Delta A_r$ ). Dual-simplex  
 401 algorithm with Gomory cuts was used to optimize the solution  
 402 for a minimal peptide set:

$$403 \quad \min \sum_{\text{peptides}} w_i S_i \quad [2]$$

$$404 \quad C_{ij} = \sum_{\text{residues}} S_i; \quad S_i \in \{0, 1\}; \quad C_{ij} \geq 1; \quad w_i = \sum P_r \Delta A_r$$

**Peptide-NSP7 binding.** All conformations in the non-redundant 404  
 405 set were rigidly docked onto the binding partners of NSP12.  
 406 The MM/PBSA-WSAS energies for binding were calculated  
 407 for peptide-NSP12 complex. The binding similitude of the  
 408 peptides to partner PFIs was determined using a 70 length  
 409 vector (an element for each residue) with respect to NSP7  
 410 by summing up the following for all docked poses of a given  
 411 peptide-PFI pair:

with 100  $\mu\text{l}$  of anti-his antibody prepared in 1X PBST buffer at 1:5,000 dilution and incubated at 37  $^{\circ}\text{C}$  for 30 min. The wells were then washed three times with 200  $\mu\text{l}$  of 1X PBS buffer. One hundred microlitre 3,3',5,5'-tetramethylbenzidine substrate (Thermo Fisher Scientific) was added to each well and incubated for 10 min. The reaction was stopped by adding 100  $\mu\text{L}$  of 0.18 M sulphuric acid and the optical densities of the plate wells were measured using Biotek plate reader at 450 nm.

$$\hat{X} = \sum_{p=1}^{\text{poses}} \frac{A_p^{\text{NSP7}} - A_p^{\text{Pep-NSP7}}}{A_{\text{total},p}^{\text{NSP7}}} \cdot \frac{e^{-\frac{E_{\Delta G,p}}{kT}}}{\sum_{\text{poses}} e^{-\frac{E_{\Delta G,p}}{kT}}} \quad [3]$$

$$\hat{Y} = \sum_{p=1}^{\text{poses}} \frac{A_p^{\text{NSP7}} - A_p^{\text{NSP12-NSP7}}}{A_{\text{total},p}^{\text{NSP12-NSP7}}} \cdot \frac{e^{-\frac{E_{\Delta G,p}}{kT}}}{\sum_{\text{poses}} e^{-\frac{E_{\Delta G,p}}{kT}}} \quad [4]$$

$$\cos \theta = \hat{X} \cdot \hat{Y} \quad [5]$$

The cosine similarity of this vector with the vector obtained for each of the NSP12-NSP7 complexes (central structures using a backbone clustering of 2.5  $\text{\AA}$ ) was found. Peptides with high dot products ( $> 0.90$  of the maximum dot product) were docked using Rosetta's FlexPepDock to introduce flexibility in the peptide backbones. The dot products were recalculated using the Rosetta interface energy scores ( $I_{\text{sc}}$ ) (56) to identify the most effective flexible peptides binding to NSP7. The top scoring structures from the enriched ensemble were subjected to explicit all-atom molecular dynamics simulations in the canonical ensemble for 20 ns using the CHARMM-36m force-field with the Nosé-Hoover thermostat and Parrinello-Rahman barostat.

#### Experimental methods.

**SPR measurement.** The binding Kinetics of NSP 7 with NSP 12, P4 and P5 proteins were measured by using a Biacore X-100 system with CM5 chips (Cytiva). The NSP 7 protein was immobilized on the chip by amine coupling with a concentration of 50  $\mu\text{g}/\text{ml}$  (diluted by 0.1 mM NaAc, PH 4.5) according to the manufacturer's recommendation. For all measurements, the same running buffer was used which consists of 20 mM HEPES, pH 7.5, 150 mM NaCl and 0.005% tween-20 with a flow rate of 30 mL/min at 25 degree C. Serially diluted protein samples are injected in a series of 0.19, 0.39, 0.78, 1.56 and 3.12 $\mu\text{M}$  with association time 60s and followed by 90s dissociation phase. The Multi-cycle binding kinetics was analyzed with the Biacore X-100 Evaluation Software (Cytiva) and fitted with a 1:1 binding model.

**Competitive inhibition using ELISA.** FLAG-taq Nsp12 and his-taq (HRP) nsp7 proteins of SARS-CoV-2 were purchased from BPS Biosciences, San Diego, CA, USA. The peptides were purchased from Genscript Biotech Corporation, New Jersey, USA. SARS-CoV-2 nsp12 protein was diluted at 10  $\text{ng}/\mu\text{l}$ -1 in PBS buffer. Two hundred nanogram protein was coated per well on a 96-microtiter ELISA plate (Nunc, Thermo Fisher Scientific) overnight at 4  $^{\circ}\text{C}$ . Next day, unbound protein was removed, and wells were washed thrice with 1X PBS buffer. Wells were then blocked with 4% (w/v) skimmed milk prepared in 1X PBS buffer and incubated at 37  $^{\circ}\text{C}$  for 45 min. The peptides were dissolved in water and were incubated with the coated protein of Nsp12 in an increasing gradient (1:1, 1:3, 1:5, 1:10, 1:20). For the positive control, no peptide was added to the well. Incubated peptides were allowed to interact with the coated NSp12 protein with slow shaking at room temperature for 1 h. Thirty microlitres of diluted nsp7 protein of SARS-CoV-2 (150 ng) was added to the well plate in triplicate and were allowed to interact with the coated Nsp12 protein at room temperature for 1 hr with shaking. Wells were then washed with 200  $\mu\text{l}$  of PBS buffer three times followed by incubation

- 475 **Author Affiliations.** Department of Chemical Engineering, 558  
476 Indian Institute of Technology Delhi, Delhi 110016, India 559  
477 560
- 478 1. N Zhu, et al., A Novel Coronavirus from Patients with Pneumonia in China, 2019. *New Engl. J. Medicine* **382**, 727–733 (2020). 561
  - 479 2. F Wu, et al., A new coronavirus associated with human respiratory disease in China. *Nature* **579**, 265–269 (2020). 562
  - 480 3. HS Hillen, et al., Structure of replicating SARS-CoV-2 polymerase. *Nature* **584**, 154–156 (2020). 563
  - 481 4. Y Gao, et al., Structure of the RNA-dependent RNA polymerase from COVID-19 virus. *Science* **368**, 779–782 (2020). 564
  - 482 5. M Machitani, M Yasukawa, J Nakashima, Y Furuichi, K Masutomi, RNA-dependent RNA polymerase, RdRp, a promising therapeutic target for cancer and potentially COVID-19. *Cancer Sci.* **111**, 3976–3984 (2020). 565
  - 483 6. L Tian, et al., RNA-dependent RNA polymerase (RdRp) inhibitors: The current landscape and repurposing for the COVID-19 pandemic. *Eur. J. Medicinal Chem.* **213**, 113201 (2021). 566
  - 484 7. RN Kirchdoerfer, AB Ward, Structure of the SARS-CoV nsp12 polymerase bound to nsp7 and nsp8 co-factors. *Nat. Commun.* **10**, 1–9 (2019). 567
  - 485 8. TP Sheahan, et al., An orally bioavailable broad-spectrum antiviral inhibits SARS-CoV-2 in human airway epithelial cell cultures and multiple coronaviruses in mice. *Sci. Transl. Medicine* **12** (2020). 568
  - 486 9. L Subissi, et al., One severe acute respiratory syndrome coronavirus protein complex integrates processive RNA polymerase and exonuclease activities. *Proc. Natl. Acad. Sci. United States Am.* **111**, E3900–E3909 (2014). 569
  - 487 10. DG Ahn, JK Choi, DR Taylor, JW Oh, Biochemical characterization of a recombinant SARS coronavirus nsp12 RNA-dependent RNA polymerase capable of copying viral RNA templates. *Arch. Virol.* **157**, 2095–2104 (2012). 570
  - 488 11. W Yin, et al., Structural basis for inhibition of the SARS-CoV-2 RNA polymerase by suramin. *Nat. Struct. Mol. Biol.* **28**, 319–325 (2021). 571
  - 489 12. R Cannalire, C Cerchia, AR Beccari, FS Di Leva, V Summa, Targeting SARS-CoV-2 Proteases and Polymerase for COVID-19 Treatment: State of the Art and Future Opportunities. *J. Medicinal Chem.* (2020). 572
  - 490 13. DE Gordon, et al., A SARS-CoV-2 protein interaction map reveals targets for drug repurposing. *Nature* **583**, 459–468 (2020). 573
  - 491 14. DES Research, "Molecular Dynamics Simulations Related to SARS-CoV-2," D. E. Shaw Research Technical Data, (2020). 574
  - 492 15. J Diaz, SARS-CoV-2 Molecular Network Structure. *Front. Physiol.* **11**, 1–8 (2020). 575
  - 493 16. SJ Fleishman, et al., of Influenza Hemagglutinin. *Science* **979**, 816–822 (2011). 576
  - 494 17. A Mishra, et al., Structure-Based Design of Small Peptide Ligands to Inhibit Early-Stage Protein Aggregation Nucleation. *J. Chem. Inf. Model.* **60**, 3304–3314 (2020). 577
  - 495 18. D Eggink, et al., HIV-1 anchor inhibitors and membrane fusion inhibitors target distinct but overlapping steps in virus entry. *J. Biol. Chem.* **294**, 5736–5746 (2019). 578
  - 496 19. SS Usmani, et al., THPdb: Database of FDA-approved peptide and protein therapeutics. *PLoS ONE* **12**, 1–12 (2017). 579
  - 497 20. M Mutzenthaler, GF King, DJ Adams, PF Alewood, Trends in peptide drug discovery. *Nat. Rev. Drug Discov.* **20**, 309–325 (2021). 580
  - 498 21. D Schütz, et al., Peptide and peptide-based inhibitors of SARS-CoV-2 entry. *Adv. Drug Deliv. Rev.* **167**, 47–65 (2020). 581
  - 499 22. F Milletti, Cell-penetrating peptides: Classes, origin, and current landscape. *Drug Discov. Today* **17**, 850–860 (2012). 582
  - 500 23. DM Weinreich, et al., REGN-COV2, a Neutralizing Antibody Cocktail, in Outpatients with Covid-19. *New Engl. J. Medicine* **384**, 238–251 (2021). 583
  - 501 24. L Cao, et al., De novo design of picomolar SARS-CoV-2 miniprotein inhibitors. *Science* **370**, 426–431 (2020). 584
  - 502 25. A Sadromontaz, et al., Synthetic Peptides That Antagonize the Angiotensin-Converting Enzyme-2 (ACE-2) Interaction with SARS-CoV-2 Receptor Binding Spike Protein. *J. Medicinal Chem.* **2** (2021). 585
  - 503 26. S Pomplun, et al., De Novo Discovery of High-Affinity Peptide Binders for the SARS-CoV-2 Spike Protein. *ACS Cent. Sci.* **7**, 156–163 (2021). 586
  - 504 27. PA Valiente, et al., Computational Design of Potent D-Peptide Inhibitors of SARS-CoV-2. *J. Medicinal Chem.* (2021). 587
  - 505 28. P Adhikary, et al., Discovery of Small Anti-ACE2 Peptides to Inhibit SARS-CoV-2 Infectivity. *Adv. Ther.* **2100087**, 1–9 (2021). 588
  - 506 29. H Zhao, et al., Cross-linking peptide and repurposed drugs inhibit both entry pathways of SARS-CoV-2. *Nat. Commun.* **12**, 1–9 (2021). 589
  - 507 30. Shagufta, I Ahmad, The race to treat COVID-19: Potential therapeutic agents for the prevention and treatment of SARS-CoV-2. *Eur. J. Medicinal Chem.* **213**, 113157 (2021). 590
  - 508 31. HTH Chan, et al., Discovery of SARS-CoV-2 M pro peptide inhibitors from modelling substrate and ligand binding. *Chem. Sci.* (2021). 591
  - 509 32. J Janin, RP Bahadur, P Chakrabarti, Protein-protein interaction and quaternary structure. *Q. Rev. Biophys.* **41**, 133–180 (2008). 592
  - 510 33. T Clackson, JA Wells, A hot spot of binding energy in a hormone receptor interface. *Science* **267**, 383–386 (1995). 593
  - 511 34. TW Linsky, et al., De novo design of potent and resilient hACE2 decoys to neutralize SARS-CoV-2. *Science* **370**, 1208–1214 (2020). 594
  - 512 35. JA Wells, CL McClendon, Reaching for high-hanging fruit in drug discovery at protein-protein interfaces (2007). 595
  - 513 36. S Belkin, PJ Kundrotas, IA Vakser, Inhibition of protein interactions: co-crystallized protein-protein interfaces are nearly as good as holo proteins in rigid-body ligand docking. *J. Comput. Mol. Des.* **32**, 769–779 (2018). 596
  - 514 37. N London, B Raveh, D Movshovitz-Attias, O Schueler-Furman, Can self-inhibitory peptides be derived from the interfaces of globular protein-protein interactions? *Proteins: Struct. Funct. Bioinforma.* **78**, 3140–3149 (2010). 597
  38. N London, B Raveh, O Schueler-Furman, Druggable protein-protein interactions - from hot spots to hot segments. *Curr. Opin. Chem. Biol.* **17**, 952–959 (2013). 598
  39. N London, D Movshovitz-Attias, O Schueler-Furman, The Structural Basis of Peptide-Protein Binding Strategies. *Structure* (2010). 599
  40. D Kozakov, et al., Structural conservation of druggable Hot spots in protein - Protein interfaces. *Proc. Natl. Acad. Sci. United States Am.* **108**, 13528–13533 (2011). 600
  41. DK Johnson, J Karanicolas, Druggable Protein Interaction Sites Are More Predisposed to Surface Pocket Formation than the Rest of the Protein Surface. *PLoS Comput. Biol.* **9** (2013). 601
  42. X Du, et al., Insights into protein-ligand interactions: Mechanisms, models, and methods. *Int. J. Mol. Sci.* **17**, 1–34 (2016). 602
  43. S Jones, JM Thornton, Principles of protein-protein interactions. *PNAS* **93**, 13–20 (1996). 603
  44. A Pal, P Chakrabarti, R Bahadur, F Rodier, J Janin, Peptide segments in protein-protein interfaces. *J. Biosci.* **32**, 101–111 (2007). 604
  45. Y Chebaro, S Pasquali, P Derreumaux, The coarse-grained OPEP force field for non-amyloid and amyloid proteins. *J. Phys. Chem. B* (2012). 605
  46. E Jurrus, et al., Improvements to the APBS biomolecular solvation software suite. *Protein Sci.* **27**, 112–128 (2018). 606
  47. A Chevalier, et al., Massively parallel de novo protein design for targeted therapeutics. *Nature* **550**, 74–79 (2017). 607
  48. Y Zhang, J Skolnick, TM-align: A protein structure alignment algorithm based on the TM-score. *Nucleic Acids Res.* **33**, 2302–2309 (2005). 608
  49. C Wang, et al., Calculating protein-ligand binding affinities with MMPBSA: Method and error analysis. *J. Comput. Chem.* **37**, 2436–2446 (2016). 609
  50. J Wang, T Hou, Develop and test a solvent accessible surface area-based model in conformational entropy calculations. *J. Chem. Inf. Model.* **52**, 1199–1212 (2012). 610
  51. N London, B Raveh, E Cohen, G Fathi, O Schueler-Furman, Rosetta FlexPepDock web server - High resolution modeling of peptide-protein interactions. *Nucleic Acids Res.* (2011). 611
  52. GJ Philippe, DJ Craik, ST Henriques, Converting peptides into drugs targeting intracellular protein-protein interactions. *Drug Discov. Today* **26**, 1521–1531 (2021). 612
  53. Y Shen, J Maupetit, P Derreumaux, P Tufféry, Improved PEP-FOLD approach for peptide and miniprotein structure prediction. *J. Chem. Theory Comput.* (2014). 613
  54. Y Zhang, J Skolnick, Scoring function for automated assessment of protein structure template quality. *Proteins: Struct. Funct. Genet.* **57**, 702–710 (2004). 614
  55. MATLAB version 9.9.0.1524771 (R2020b) Update 2 (2020). 615
  56. RF Alford, et al., The Rosetta All-Atom Energy Function for Macromolecular Modeling and Design. *J. Chem. Theory Comput.* **13**, 3031–3048 (2017). 616
